# Supplementary material for: An RNA-Scaffold Protein Subunit Vaccine for Nasal Immunization
Source: MDPI journal article supplement (doi:10.3390/vaccines11101550), 2023-09-29
Supplement: s1 [file s1]

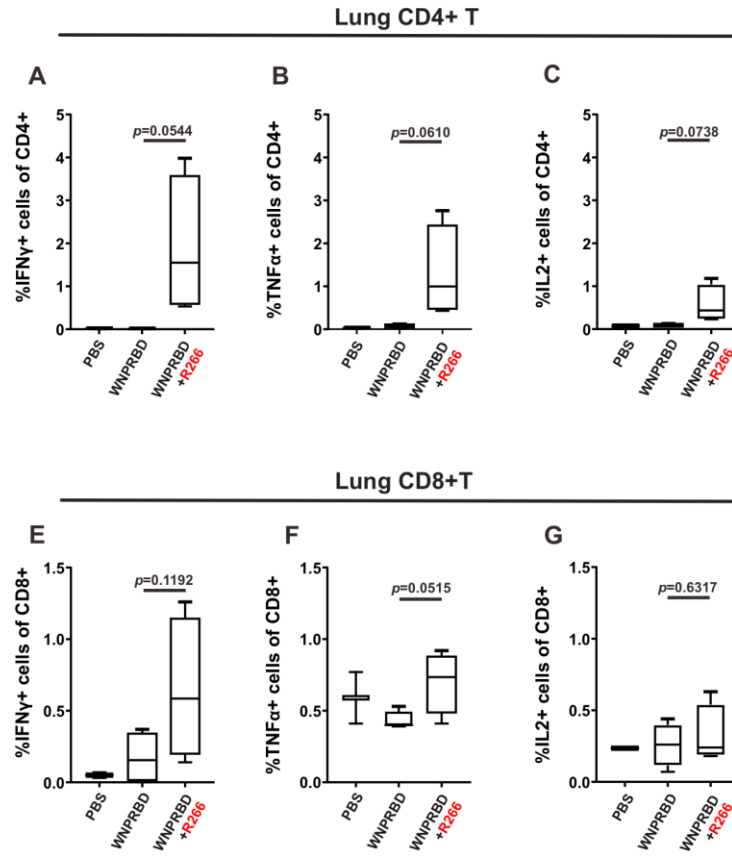

**Supplementary figure 1. WNPRBD-R266 activates T cell responses in mice lung.** Lung of the same mice described in T cell assays in Figure 4 were also harvested and analyzed for lung T cell activation. (A-C) CD4+ and (D-F) CD8+ antigen-specific T cells were analyzed.

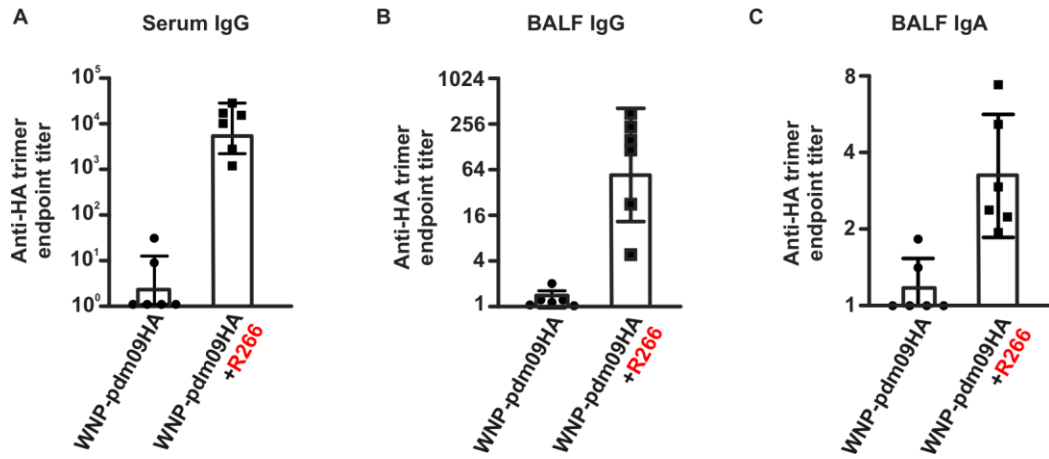

**Supplementary figure 2. Ribonucleoprotein influenza A-H1N1 version elicits mucosal and neutralizing antibodies in mice.** (A-C) BALB/c mice were intranasally immunized with 2 doses of WNP-pdm09HA-R266, with 14 days in between. Sera and BALF were harvested at 14 days post 2<sup>nd</sup> dose. HA-trimer specific antibody levels were determined by ELISA.
